# Supplementary material
Source: MDPI journal article supplement (https://www.mdpi.com/2072-4292/12/7/1158)
Supplement: s1 [file s1]

**Table S1.** Reflectance response of the C cover type biological soil crusts (BSCs) in the Landsat-8 and Sentinel-2 bands under dry and wet conditions.

| BSC  cover | Condition | Landsat-8 OLI | | | | | | Sentinel-2 MSI | | | | | | |
| --- | --- | --- | --- | --- | --- | --- | --- | --- | --- | --- | --- | --- | --- | --- |
| Band 1 | | Band 2 | Band 3 | Band 4 | Band 5 | Band 2 | Band 3 | Band 4 | Band 5 | Band 6 | Band 7 | Band 8A |
| (Coastal) | | (Blue) | (Green) | (Red) | (NIR) | (Blue) | (Green) | (Red) | (Red edge) | | | (NIR) |
| [0%, 20%] | Dry | | 0.097  ±0.005 | 0.117  ±0.006 | 0.189  ±0.011 | 0.250  ±0.015 | 0.289  ±0.014 | 0.123  ±0.007 | 0.188  ±0.011 | 0.252  ±0.015 | 0.266  ±0.015 | 0.279  ±0.015 | 0.286  ±0.015 | 0.289  ±0.015 |
| Wet | | 0.060  ±0.004 | 0.073  ±0.005 | 0.121  ±0.009 | 0.161  ±0.013 | 0.191  ±0.014 | 0.077  ±0.005 | 0.120  ±0.009 | 0.162  ±0.038 | 0.173  ±0.014 | 0.183  ±0.015 | 0.189  ±0.015 | 0.191  ±0.014 |
| Difference | | 0.037  ±0.003*** | 0.044  ±0.003*** | 0.068  ±0.005*** | 0.089  ±0.006*** | 0.098  ±0.006*** | 0.046  ±0.004*** | 0.067  ±0.005*** | 0.090  ±0.006*** | 0.093  ±0.006*** | 0.095  ±0.006*** | 0.098  ±0.006*** | 0.098  ±0.006*** |
| (20%, 40%] | Dry | | 0.097  ±0.007 | 0.117  ±0.009 | 0.189  ±0.014 | 0.247  ±0.016 | 0.292  ±0.016 | 0.122  ±0.010 | 0.188  ±0.014 | 0.249  ±0.016 | 0.266  ±0.017 | 0.280  ±0.017 | 0.289  ±0.017 | 0.291  ±0.016 |
| Wet | | 0.062  ±0.004 | 0.075  ±0.005 | 0.123  ±0.009 | 0.159  ±0.011 | 0.195  ±0.011 | 0.078  ±0.005 | 0.122  ±0.009 | 0.159  ±0.022 | 0.175  ±0.011 | 0.186  ±0.011 | 0.193  ±0.012 | 0.195  ±0.011 |
| Difference | | 0.035  ±0.004** | 0.043  ±0.005** | 0.067  ±0.008** | 0.088  ±0.010** | 0.097  ±0.011** | 0.045  ±0.006** | 0.066  ±0.008** | 0.089  ±0.010** | 0.091  ±0.011** | 0.094  ±0.011** | 0.096  ±0.011** | 0.097  ±0.011** |
| (40%, 60%] | Dry | | 0.098  ±0.003 | 0.119  ±0.003 | 0.195  ±0.007 | 0.251  ±0.015 | 0.289  ±0.008 | 0.125  ±0.004 | 0.195  ±0.007 | 0.252  ±0.015 | 0.269  ±0.014 | 0.284  ±0.012 | 0.288  ±0.011 | 0.289  ±0.008 |
| Wet | | 0.072  ±0.006 | 0.087  ±0.008 | 0.147  ±0.013 | 0.186  ±0.014 | 0.230  ±0.024 | 0.092  ±0.008 | 0.147  ±0.013 | 0.186  ±0.032 | 0.207  ±0.018 | 0.223  ±0.022 | 0.228  ±0.023 | 0.230  ±0.024 |
| Difference | | 0.027  ±0.008* | 0.032  ±0.011* | 0.049  ±0.019 ns | 0.065  ±0.024 ns | 0.059  ±0.029 ns | 0.033  ±0.011* | 0.048  ±0.019 ns | 0.066  ±0.024 ns | 0.062  ±0.028 ns | 0.061  ±0.030 ns | 0.060  ±0.030 ns | 0.059  ±0.029 ns |
| (60%, 80%] | Dry | | 0.074  ±0.005 | 0.090  ±0.006 | 0.141  ±0.011 | 0.182  ±0.014 | 0.242  ±0.009 | 0.094  ±0.007 | 0.140  ±0.011 | 0.183  ±0.015 | 0.201  ±0.013 | 0.218  ±0.012 | 0.228  ±0.011 | 0.241  ±0.009 |
| Wet | | 0.042  ±0.004 | 0.051  ±0.005 | 0.084  ±0.008 | 0.107  ±0.011 | 0.177  ±0.008 | 0.054  ±0.005 | 0.084  ±0.008 | 0.107  ±0.038 | 0.130  ±0.010 | 0.150  ±0.008 | 0.161  ±0.008 | 0.177  ±0.008 |
| Difference | | 0.032  ±0.001*** | 0.039  ±0.002*** | 0.057  ±0.004*** | 0.075  ±0.005*** | 0.065  ±0.010*** | 0.040  ±0.002*** | 0.056  ±0.004*** | 0.076  ±0.006*** | 0.071  ±0.007*** | 0.068  ±0.008*** | 0.068  ±0.009*** | 0.065  ±0.010*** |
| (80%, 100%] | Dry | | 0.068  ±0.004 | 0.081  ±0.005 | 0.124  ±0.009 | 0.154  ±0.011 | 0.222  ±0.011 | 0.084  ±0.006 | 0.124  ±0.009 | 0.154  ±0.011 | 0.175  ±0.012 | 0.193  ±0.012 | 0.205  ±0.012 | 0.222  ±0.011 |
| Wet | | 0.040  ±0.003 | 0.048  ±0.004 | 0.077  ±0.006 | 0.095  ±0.007 | 0.174  ±0.008 | 0.050  ±0.004 | 0.078  ±0.006 | 0.094  ±0.027 | 0.119  ±0.007 | 0.141  ±0.007 | 0.153  ±0.007 | 0.174  ±0.008 |
| Difference | | 0.028  ±0.002*** | 0.033  ±0.003*** | 0.047  ±0.005*** | 0.059  ±0.006*** | 0.048  ±0.008*** | 0.034  ±0.003*** | 0.046  ±0.005*** | 0.060  ±0.006*** | 0.055  ±0.006*** | 0.052  ±0.007*** | 0.051  ±0.007*** | 0.048  ±0.008*** |

Note: Data are presented as means ± standard error (SE). Within each coverage group in each band, superscript “***” indicates a very significant difference between the means under dry and wet conditions at *P* < 0.001; superscript “**” indicates a highly significant difference between the means under dry and wet conditions at *P* < 0.01; superscript “*” indicates a slightly significant difference between the means under dry and wet conditions at *P* < 0.05; and superscript “ns” indicates no significant difference between the means under dry and wet conditions at *P* > 0.05, based on the paired two-sample mean analysis results. See Table 2 for band details.


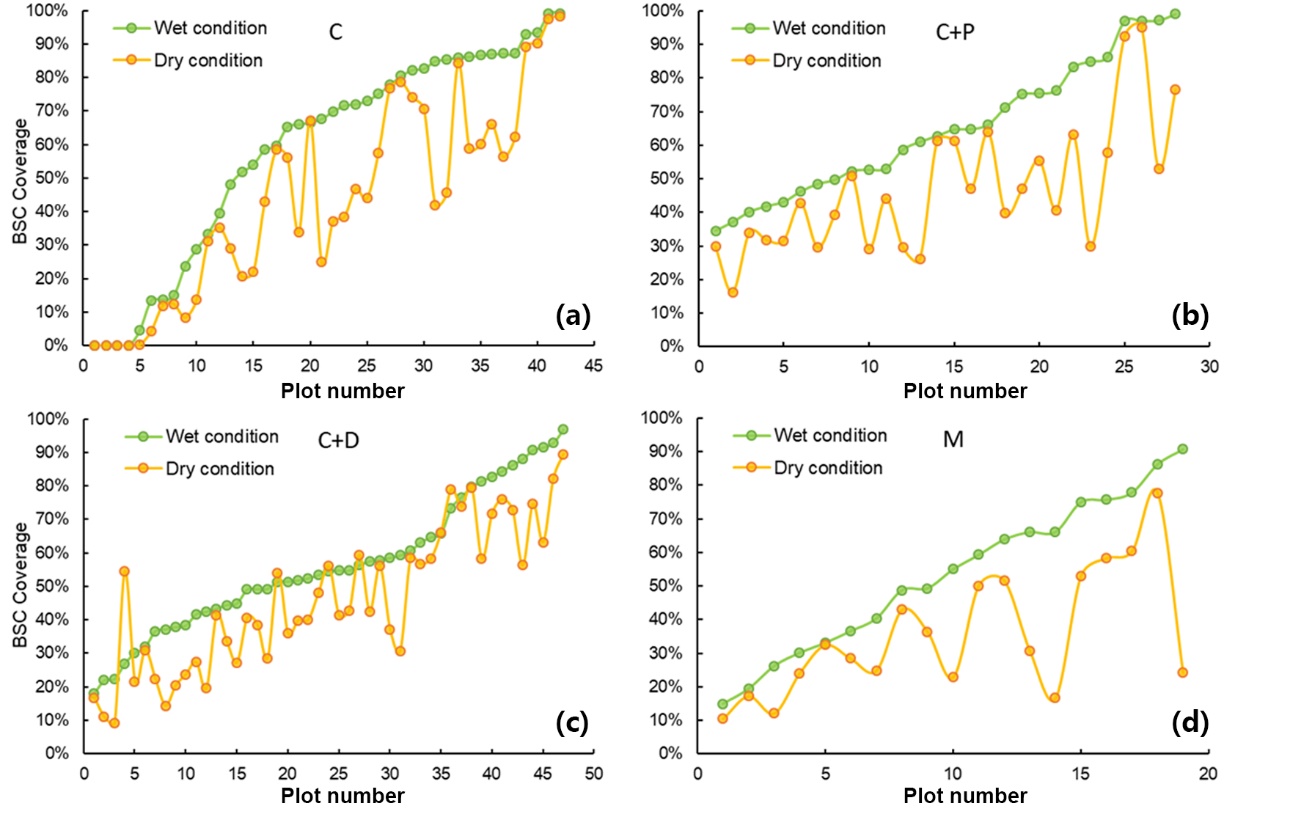


**Figure S1.** Estimation of BSC coverage in dry and wet conditions with the cover of (a) C, (b) C+P, (c) C+D, and (d) M. A pair of yellow and green points on the same x-axis is one plot in dry and wet conditions respectively. All plots are arranged from low to high according to the BSC coverage under wet conditions.


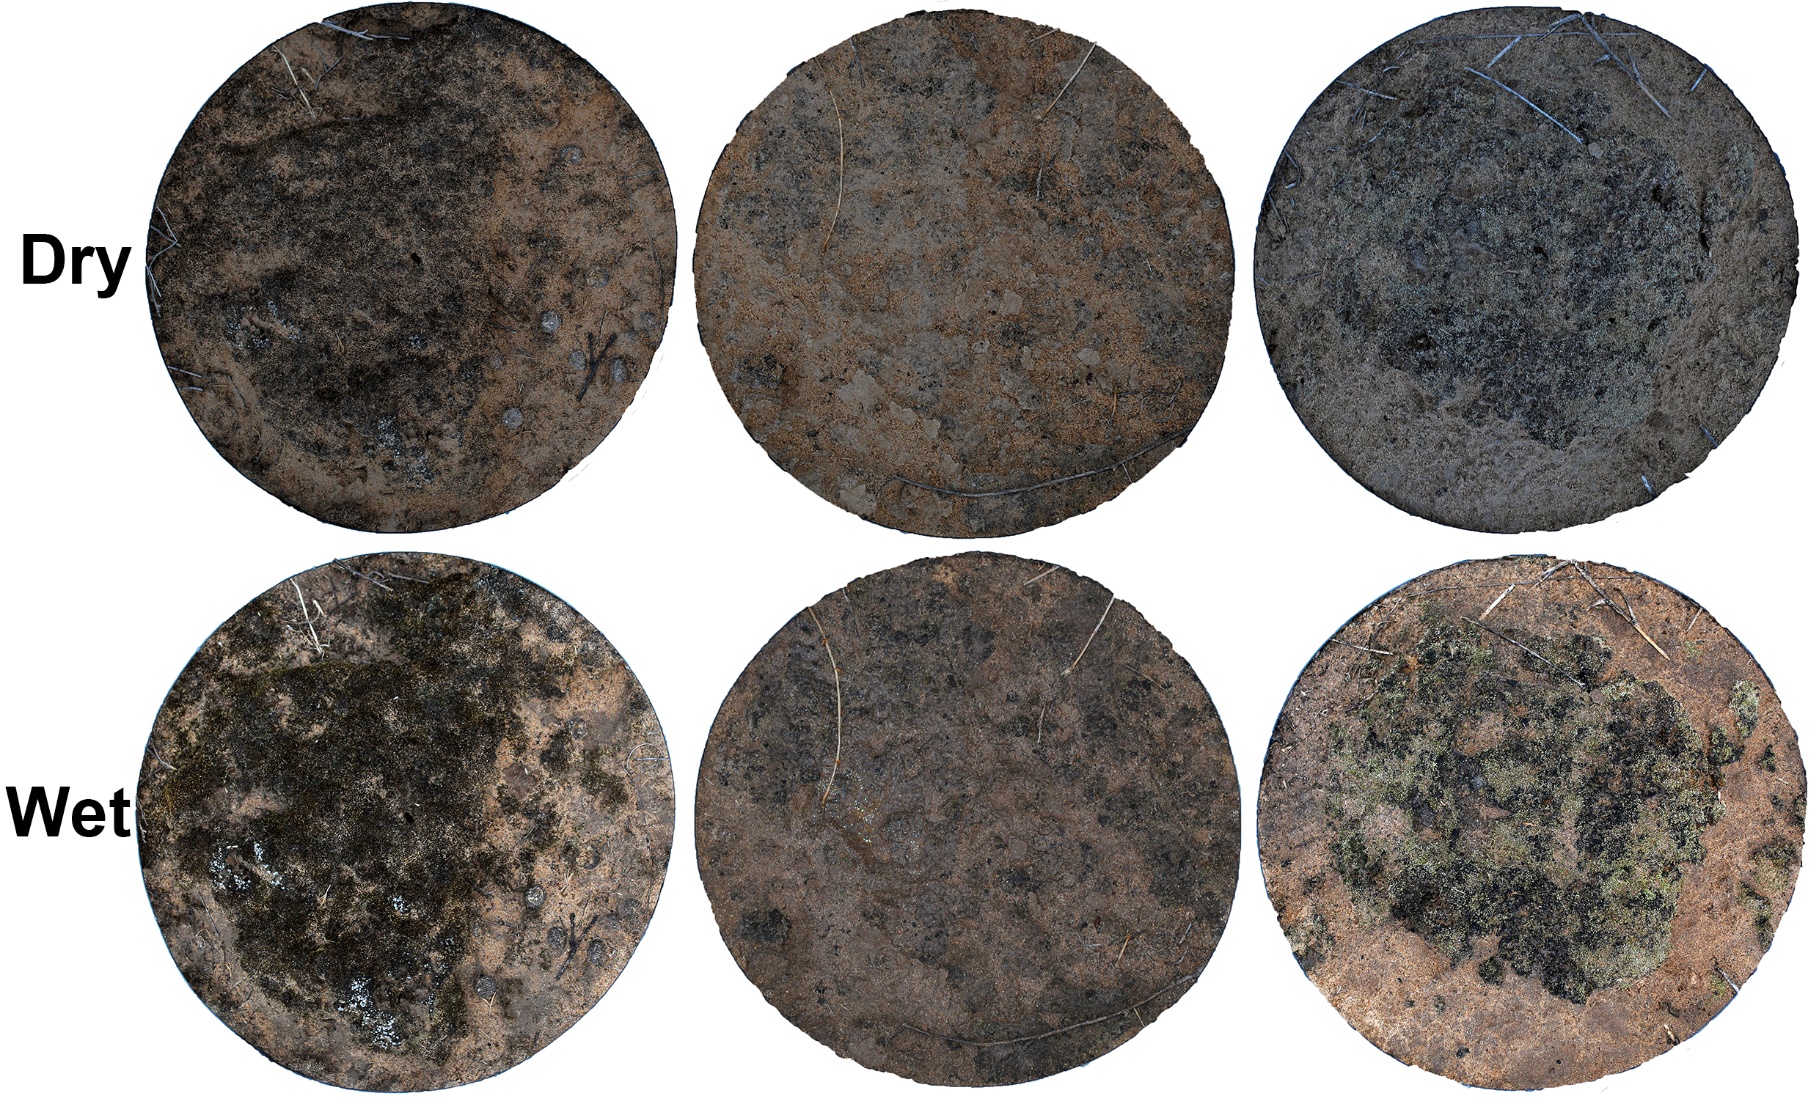


**Figure S2**: Photos of 40%–60% coverage biological soil crust (BSC) plots which contain light-colored lichens.
